# Supplementary material for: Portable Device for Potentiometric Determination of Antioxidant Capacity
Source: MDPI journal article supplement (doi:10.3390/s23187845), 2023-09-13
Supplement: s1 [file s1]

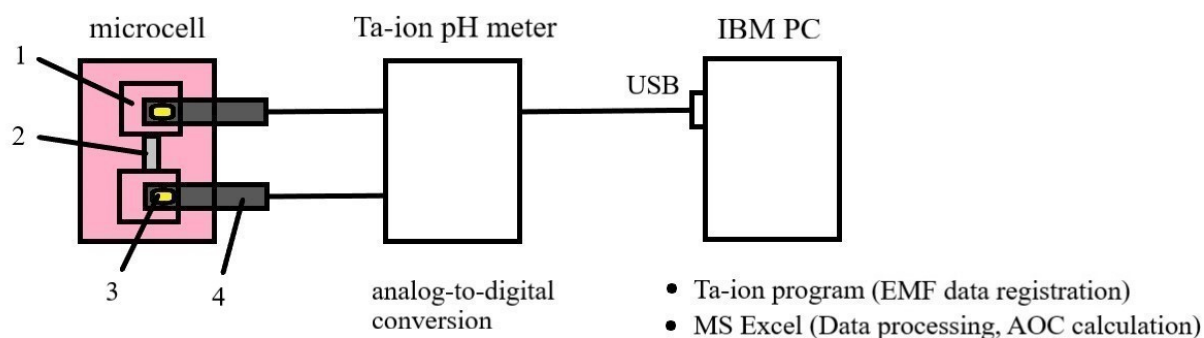

**Figure S1.** The functional diagram of the measuring setup. Designations: 1 - half-cell, 2 - semipermeable membrane, 3 - immobilized reagent, 4 – CSPE.

**Table S1.** EMF of microcells with immobilized reagents on CSPE and a ready-made solution of reagents for different immobilization conditions and corresponding micrographs of CSPE (n=5, P=0.95)

| Reagents immobilization conditions       | (EMFaverage $\pm\Delta$ ), mV (microcell with immobilized reagents) | (EMFaverage $\pm\Delta$ ), mV (microcell with a ready solution of reagents) | Micrograph of electrodes with immobilized reagents (2.5-fold magnification)           |
|------------------------------------------|---------------------------------------------------------------------|-----------------------------------------------------------------------------|---------------------------------------------------------------------------------------|
| freeze drying                            | 333 $\pm$ 71                                                        | 339 $\pm$ 5                                                                 | 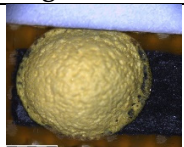 |
| keeping at room temperature              | 320 $\pm$ 3                                                         |                                                                             |  |
| heating (drying cabinet)                 | 336 $\pm$ 9                                                         |                                                                             |  |
| heating with convection (drying cabinet) | 338 $\pm$ 4                                                         |                                                                             |  |
| UV-drying                                | 313 $\pm$ 9                                                         |                                                                             |  |
